# Supplementary material for: The Effect of Chronic Methamphetamine Treatment on Schizophrenia Endophenotypes in Heterozygous Reelin Mice: Implications for Schizophrenia
Source: MDPI journal article supplement (doi:10.3390/biom10060940), 2020-06-22
Supplement: s1 [file s1]

# The effect of chronic methamphetamine treatment on schizophrenia endophenotypes in heterozygous Reelin mice: implications for schizophrenia

Camilla Hume, Shelley Massey and Maarten van den Buuse \*

School of Psychology and Public Health, La Trobe University, Melbourne, Australia; [c.hume@latrobe.edu.au](mailto:c.hume@latrobe.edu.au) (C.H.); [shelley.massey.8@gmail.com](mailto:shelley.massey.8@gmail.com) (S.M.)

\* Correspondence: [m.vandenbuuse@latrobe.edu.au](mailto:m.vandenbuuse@latrobe.edu.au)

**Supplementary Table 1.**

Additional relevant behaviours and data separated for males and females. For number of animals per group, see Table 1. Data are mean  $\pm$  SEM.

|                                                                                | Saline Pretreatment |                 |                 |                 | Meth Pretreatment |                 |                 |                 | Significant differences?                                                                                                                                     |
|--------------------------------------------------------------------------------|---------------------|-----------------|-----------------|-----------------|-------------------|-----------------|-----------------|-----------------|--------------------------------------------------------------------------------------------------------------------------------------------------------------|
| Behavioural parameter                                                          | Male WT             | Female WT       | Male HRM        | Female HRM      | Male WT           | Female WT       | Male HRM        | Female HRM      |                                                                                                                                                              |
| Locomotor Total Distance (cm) Moved Post-Injection - Total Arena               |                     |                 |                 |                 |                   |                 |                 |                 |                                                                                                                                                              |
| Total distance saline                                                          | 7478<br>± 805       | 6530<br>± 1101  | 8765<br>± 1571  | 10531<br>± 2462 | 8220<br>± 1150    | 5559<br>± 1125  | 7508<br>± 1149  | 6805<br>± 1829  |                                                                                                                                                              |
| Total distance Meth 1 mg/kg                                                    | 6812<br>± 961       | 6729<br>± 1126  | 7734<br>± 2525  | 7043<br>± 1597  | 16434<br>± 2043   | 14828<br>± 1723 | 11943<br>± 1666 | 13291<br>± 2558 | Acute Meth 1mg/kg vs. saline:<br>Main effect Acute Meth F(1,94)=34.1, $p < 0.001$<br>Acute Meth x Meth pretreatment interaction F(1,94)=51.3, $P < 0.001$    |
| Total distance Meth 3 mg/kg                                                    | 34990<br>± 3138     | 37910<br>± 2269 | 35499<br>± 4802 | 43539<br>± 5562 | 53753<br>± 3010   | 54419<br>± 3612 | 49777<br>± 3336 | 55601<br>± 4604 | Acute Meth 3mg/kg vs. saline:<br>Main effect of Acute Meth F(1,95)=838.6, $P < 0.001$ ; Acute Meth x Meth pretreatment interaction F(1,94)=40.8, $p < 0.001$ |
| Locomotor Total Distance Moved (cm) Post-Injection - Inner Zone <sup>(1)</sup> |                     |                 |                 |                 |                   |                 |                 |                 |                                                                                                                                                              |
| Total distance saline                                                          | 1704<br>± 201       | 1215<br>± 244   | 2013<br>± 414   | 2629<br>± 743   | 1931<br>± 364     | 1026<br>± 244   | 1869<br>± 317   | 1673<br>± 625   |                                                                                                                                                              |
| Total distance                                                                 | 1294                | 662             | 1375            | 1097            | 2639              | 1473            | 2131            | 1946            | Acute Meth 1 mg/kg vs. saline:                                                                                                                               |

|                                                    |            |            |            |            |            |            |            |            |                                                                                                                                                                                                                                                                                                                                                 |
|----------------------------------------------------|------------|------------|------------|------------|------------|------------|------------|------------|-------------------------------------------------------------------------------------------------------------------------------------------------------------------------------------------------------------------------------------------------------------------------------------------------------------------------------------------------|
| Meth 1 mg/kg                                       | ± 248      | ± 146      | ± 547      | ± 255      | ± 405      | ± 402      | ± 338      | ± 498      | Acute Meth x Meth pretreatment interaction F(1,95)=21.5, $p < 0.001$ .<br>Acute Meth 3mg/kg vs. saline:<br>Main effect of Acute Meth F(1,95)=131.6, $p < 0.001$ ; Acute Meth x Meth pretreatment interaction F(1,95)=8.8, $p = 0.004$ ; Acute Meth x Sex interaction F(1,95)=11.7, $p = 0.001$ ; main effect of Sex F(1,95)=17.5, $p < 0.001$ . |
| Total distance                                     | 6733       | 3373       | 6792       | 4383       | 8045       | 5322       | 9425       | 5750       |                                                                                                                                                                                                                                                                                                                                                 |
| Meth 3 mg/kg                                       | ± 946      | ± 574      | ± 1109     | ± 912      | ± 929      | ± 859      | ± 1336     | ± 1044     |                                                                                                                                                                                                                                                                                                                                                 |
|                                                    |            |            |            |            |            |            |            |            |                                                                                                                                                                                                                                                                                                                                                 |
| PPI <sup>(2)</sup>                                 |            |            |            |            |            |            |            |            |                                                                                                                                                                                                                                                                                                                                                 |
| Average %PPI<br>30 msec ISI                        | 11.5 ± 4.6 | 25.5 ± 3.7 | 22.0 ± 5.5 | 21.6 ± 4.8 | 7.7 ± 6.7  | 12.9 ± 5.9 | 16.5 ± 9.8 | 21.9 ± 3.1 | No significant differences between groups                                                                                                                                                                                                                                                                                                       |
| Average %PPI<br>100 msec ISI                       | 17.6 ± 5.1 | 23.0 ± 2.9 | 24.9 ± 4.2 | 15.8 ± 4.0 | 14.0 ± 4.5 | 16.1 ± 4.2 | 20.0 ± 5.8 | 24.9 ± 3.9 | No significant differences between groups                                                                                                                                                                                                                                                                                                       |
| Average startle<br>(units)                         | 157 ± 29   | 116 ± 8    | 178 ± 27   | 130 ± 8    | 154 ± 11   | 121 ± 12   | 215 ± 19   | 115 ± 11   | Main effect of Sex (F(1,96)=19.7, $p < 0.001$ )                                                                                                                                                                                                                                                                                                 |
| Sociability: Time in Chambers (sec) <sup>(3)</sup> |            |            |            |            |            |            |            |            |                                                                                                                                                                                                                                                                                                                                                 |
| Sociability: central                               | 130 ± 8    | 129 ± 10   | 128 ± 5    | 134 ± 10   | 125 ± 12   | 106 ± 7    | 124 ± 7    | 108 ± 7    | Main effect of Meth pretreatment<br>F(1,84)=5.5, $p = 0.022$                                                                                                                                                                                                                                                                                    |
| Sociability:<br>stranger                           | 269 ± 10   | 272 ± 11   | 289 ± 9    | 276 ± 12   | 278 ± 18   | 266 ± 11   | 300 ± 22   | 297 ± 11   | No significant differences between groups.<br>Difference with empty enclosure chamber<br>F(1,84)=74.2, $p < 0.001$                                                                                                                                                                                                                              |
| Sociability: empty<br>enclosure                    | 200 ± 10   | 199 ± 11   | 184 ± 7    | 190 ± 15   | 198 ± 13   | 228 ± 12   | 176 ± 19   | 196 ± 12   | No significant differences between groups.                                                                                                                                                                                                                                                                                                      |
| Social preference:<br>central                      | 130 ± 5    | 167 ± 11   | 144 ± 6    | 155 ± 10   | 143 ± 12   | 142 ± 8    | 157 ± 11   | 150 ± 8    | No significant differences between groups                                                                                                                                                                                                                                                                                                       |
| Social preference:<br>novel stranger               | 266 ± 17   | 255 ± 10   | 271 ± 10   | 251 ± 14   | 265 ± 15   | 249 ± 15   | 262 ± 18   | 258 ± 15   | No significant differences between groups.<br>Difference with familiar stranger chamber<br>F(1,84)=52.7, $p < 0.001$                                                                                                                                                                                                                            |
| Social preference:<br>familiar stranger            | 204 ± 16   | 179 ± 11   | 186 ± 9    | 194 ± 14   | 192 ± 11   | 210 ± 16   | 180 ± 14   | 192 ± 13   | No significant differences between groups                                                                                                                                                                                                                                                                                                       |
| Sociability: Frequency in Chambers <sup>(4)</sup>  |            |            |            |            |            |            |            |            |                                                                                                                                                                                                                                                                                                                                                 |
| Sociability: central                               | 30.5 ± 2.9 | 28.9 ± 2.5 | 28.7 ± 2.6 | 26.4 ± 1.9 | 32.9 ± 3.3 | 21.9 ± 1.6 | 28.2 ± 2.7 | 23.1 ± 1.6 | Main effect of Sex F(1,84)=7.4, $p = 0.008$ ,<br>no interactions.                                                                                                                                                                                                                                                                               |
| Sociability:<br>stranger                           | 14.8 ± 1.6 | 14.6 ± 1.3 | 14.3 ± 1.5 | 13.5 ± 1.4 | 17.0 ± 1.9 | 11.4 ± 1.0 | 15.0 ± 1.4 | 11.6 ± 1.0 | Main effect of Sex F(1,84)=6.0, $p = 0.016$ ,<br>no interactions.                                                                                                                                                                                                                                                                               |
| Sociability: empty                                 | 15.6 ± 1.4 | 14.2 ± 1.4 | 14.1 ± 1.2 | 12.7 ± 0.8 | 15.6 ± 1.7 | 10.2 ± 1.0 | 12.8 ± 1.4 | 11.5 ± 1.0 | Main effect of Sex F(1,84)=6.4, $p = 0.013$ ,                                                                                                                                                                                                                                                                                                   |

|                                                          |             |            |             |            |            |            |             |            |                                                                                                                                                                                     |
|----------------------------------------------------------|-------------|------------|-------------|------------|------------|------------|-------------|------------|-------------------------------------------------------------------------------------------------------------------------------------------------------------------------------------|
| enclosure                                                |             |            |             |            |            |            |             |            | no interactions.                                                                                                                                                                    |
| Social preference: central                               | 38.4 ± 2.4  | 35.3 ± 2.4 | 41.8 ± 1.9  | 32.2 ± 2.4 | 41.1 ± 3.3 | 30.7 ± 2.7 | 43.1 ± 4.2  | 31.5 ± 2.5 | Main effect of Sex F(1,84)=18.5, $p < 0.001$ , no interactions.                                                                                                                     |
| Social preference: novel stranger                        | 19.7 ± 1.5  | 20.7 ± 1.8 | 21.4 ± 1.3  | 16.4 ± 1.4 | 19.9 ± 1.7 | 15.8 ± 1.7 | 21.4 ± 2.0  | 16.9 ± 1.4 | Main effect of Sex F(1,84)=7.9, $p = 0.006$ , no interactions. Difference with familiar stranger F(1,84)=5.7, $p = 0.019$ .                                                         |
| Social preference: familiar stranger                     | 18.5 ± 1.5  | 14.7 ± 1.3 | 20.3 ± 1.0  | 15.8 ± 1.4 | 21.0 ± 1.7 | 14.7 ± 1.4 | 21.4 ± 3.0  | 14.1 ± 1.3 | Main effect of Sex F(1,84)=21.3, $p < 0.001$ , no interactions.                                                                                                                     |
| <b>Social Preference: Sniff Time (sec)<sup>(5)</sup></b> |             |            |             |            |            |            |             |            |                                                                                                                                                                                     |
| Sociability: stranger                                    | 90 ± 8      | 94 ± 9     | 98 ± 7      | 99 ± 7     | 95 ± 10    | 90 ± 10    | 110 ± 13    | 102 ± 9    | No significant differences between groups. Difference with empty enclosure F(1,84)=119.1, $p < 0.001$ ; Stranger x Genotype interaction F(1,84)=4.5, $p = 0.037$ .                  |
| Sociability: empty enclosure                             | 52 ± 3      | 52 ± 5     | 48 ± 4      | 48 ± 5     | 56 ± 4     | 63 ± 5     | 49 ± 6      | 51 ± 7     | No significant differences between groups                                                                                                                                           |
| Social preference: novel stranger                        | 91 ± 8      | 64 ± 6     | 84 ± 8      | 67 ± 8     | 85 ± 6     | 72 ± 9     | 73 ± 7      | 80 ± 12    | Main effect of Sex F(1,92)=4.9, $p = 0.030$ , no interactions. Difference with familiar stranger F(1,84)=107.0, $p < 0.001$ ; Stranger x Sex interaction F(1,84)=7.4, $p = 0.008$ . |
| Social preference: familiar stranger                     | 44 ± 5      | 40 ± 7     | 36 ± 4      | 46 ± 6     | 44 ± 4     | 52 ± 5     | 40 ± 6      | 46 ± 4     | No significant differences between groups                                                                                                                                           |
| <b>Social Preference: Sniffing Bout Frequency</b>        |             |            |             |            |            |            |             |            |                                                                                                                                                                                     |
| Sociability: stranger                                    | 96.6 ± 4.8  | 85.9 ± 7.3 | 106.1 ± 6.2 | 89.5 ± 8.4 | 95.6 ± 8.3 | 91.7 ± 6.2 | 103.6 ± 9.2 | 99.7 ± 8.9 | No significant differences between groups. Difference with empty enclosure F(1,84)=60.4, $p < 0.001$                                                                                |
| Sociability: empty enclosure                             | 72.4 ± 6.8  | 66.1 ± 6.2 | 63.1 ± 5.0  | 54.9 ± 4.6 | 69.0 ± 4.7 | 71.3 ± 6.5 | 62.4 ± 7.7  | 65.5 ± 7.4 | No significant differences between groups                                                                                                                                           |
| Social preference: novel stranger                        | 100.8 ± 8.2 | 77.4 ± 6.2 | 86.8 ± 7.1  | 69.8 ± 7.0 | 89.2 ± 7.3 | 70.6 ± 6.6 | 88.4 ± 8.5  | 81.8 ± 6.9 | Main effect of Sex F(1,84)=10.0, $p = 0.002$ , no interactions. Difference with familiar stranger F(1,84)=58.1, $p < 0.001$ .                                                       |
| Social preference: familiar stranger                     | 65.5 ± 7.5  | 52.2 ± 4.5 | 57.6 ± 7.5  | 52.3 ± 4.6 | 58.8 ± 4.9 | 55.2 ± 6.1 | 60.1 ± 6.0  | 56.5 ± 5.3 | No significant differences between groups                                                                                                                                           |

## Notes:

<sup>(1)</sup> Possibly reflecting higher anxiety levels in female mice than in male mice, distance travelled in the inner zone of the locomotor photocells was significantly lower in female mice than in male mice (main effect of Sex  $F(1,95)=17.5$ ,  $p < 0.001$ ) and the increase in locomotor activity in the inner zone after acute treatment with 3 mg/kg of Meth was similarly smaller in female mice than in male mice (acute Meth  $\times$  Sex interaction  $F(1,95)=11.7$ ,  $p = 0.001$ ). However, sex of the animals did not interact with the chronic effect of Meth treatment, nor with genotype. There were no sex differences in total distance moved in the total photocell arena.

<sup>(2)</sup> Average startle was higher in male mice than in female mice (main effect of Sex ( $F(1,96)=19.7$ ,  $p < 0.001$ ) consistent with the higher body weight of males vs. females. There were no effects of genotype or Meth treatment or any interactions.

<sup>(3)</sup> Meth pretreatment induced an increase in the animals' tendency to explore the outer chambers of the apparatus in the sociability phase of the test, resulting in significantly lower time spent in the central chamber (main effect of Meth pretreatment  $F(1,84)=5.5$ ,  $p = 0.022$ ). For both the sociability and social preference phase of the test, time spent in the chamber with the (novel) stranger was significantly higher than the chamber with the empty enclosure or the familiar stranger.

<sup>(4)</sup> Frequency to enter chambers was consistently lower in female mice compared to male mice (see above) but this did not interact with either genotype or Meth pretreatment.

<sup>(5)</sup> In the social preference phase, female mice showed less sniffing than male mice ( $F(1,84)=107.0$ ,  $p < 0.001$ ) and less preference for the novel stranger than male mice ( $F(1,84)=7.4$ ,  $p = 0.008$ ). These sex differences did not interact with genotype or Meth pretreatment.
